# Supplementary material for: The effect of light environment during the film formation process on the morphology and function of organic photovoltaics
Source: Royal Society of Chemistry journal article supplement (doi:10.1039/c9tc03443a), 2019-01-01
Supplement: c9tc03443a1.pdf [file c9tc03443a1.pdf]

## Supporting Information

### The Effect of Light Environment during Film Formation Process on the Morphology and Function of Organic Photovoltaics

Xiaomin Wu,<sup>†</sup> Shuqiong Lan, Guocheng Zhang,<sup>‡</sup> Huipeng Chen\* and Tailiang Guo

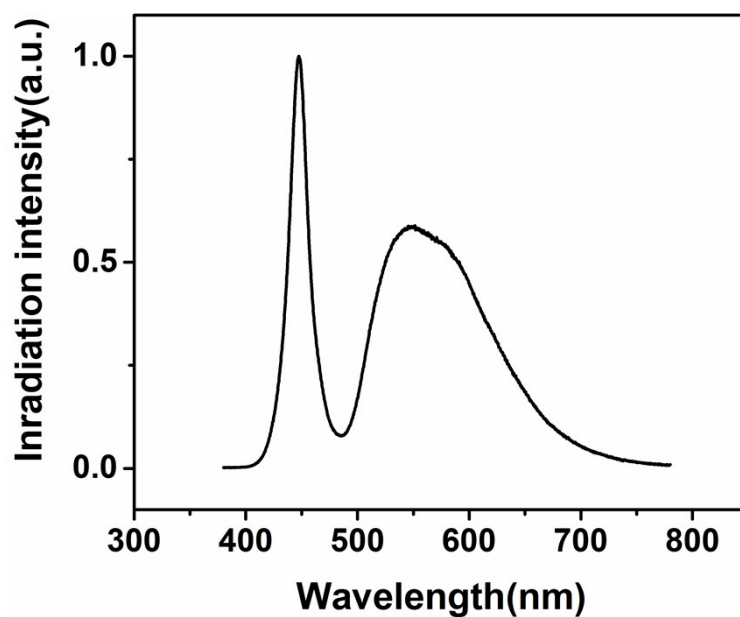

Fig. S1 The irradiation spectrum of the white LED.

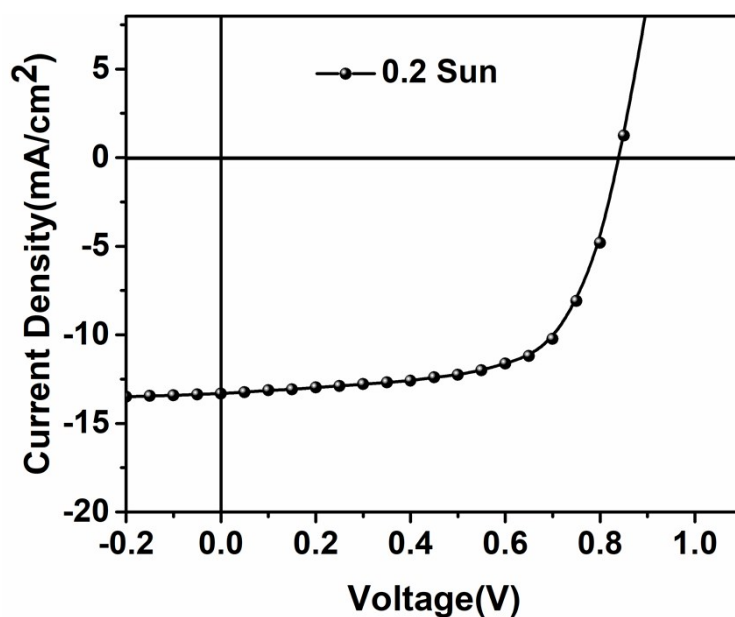

Fig. S2 J-V curves for p-DTS(FBTTH<sub>2</sub>)<sub>2</sub>:PCBM blends obtained under 0.2 Sun.

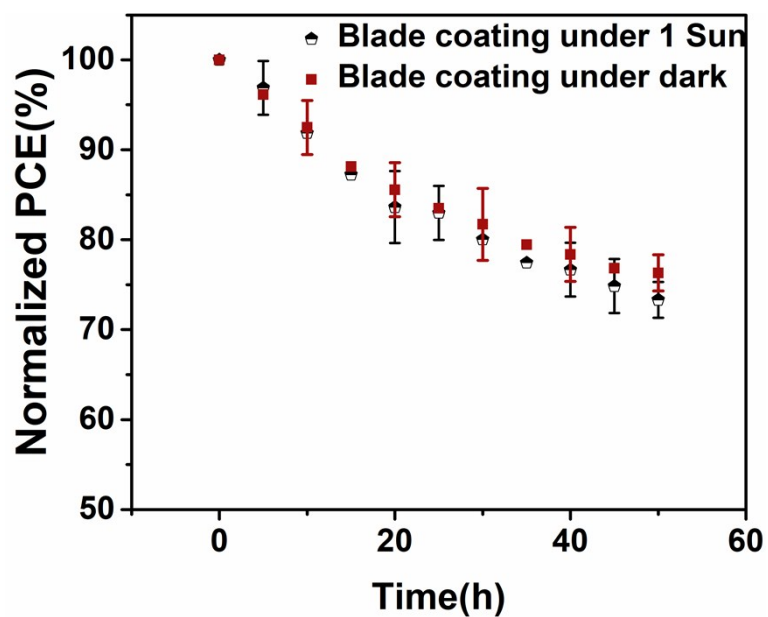

**Fig. S3** Stability curves of p-DTS(FBTTH<sub>2</sub>)<sub>2</sub>:PCBM devices obtained with dark and 1 Sun under continuous AM 1.5G illumination for 50 h.

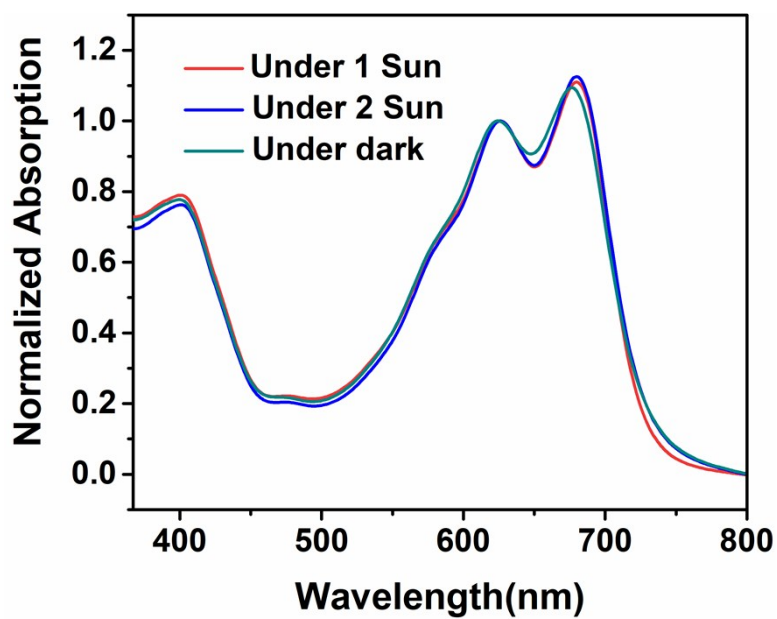

**Fig. S4** Normalized UV-vis absorption spectra of p-DTS(FBTTH<sub>2</sub>)<sub>2</sub>:PCBM devices obtained from different light intensities.

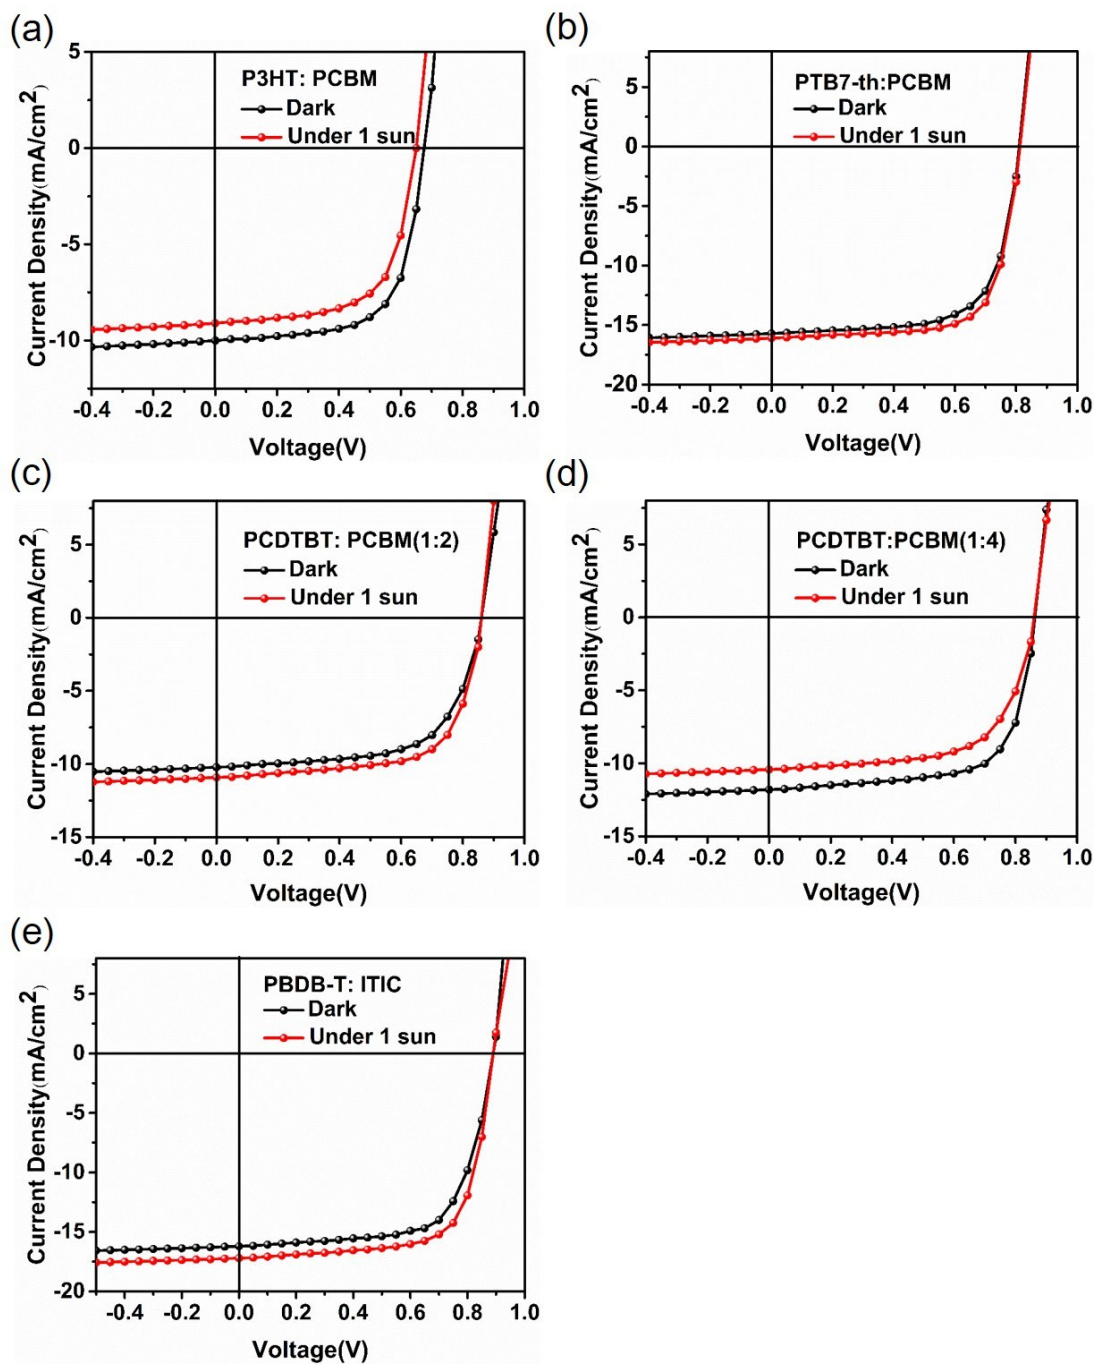

**Fig. S5** J-V curves for (a) P3HT:PCBM; (b) PTB7-th:PCBM; (c) PCDTBT:PCBM (1:2); (d) PCDTBT:PCBM (1:4); (e) PBDB-T:ITIC blends.

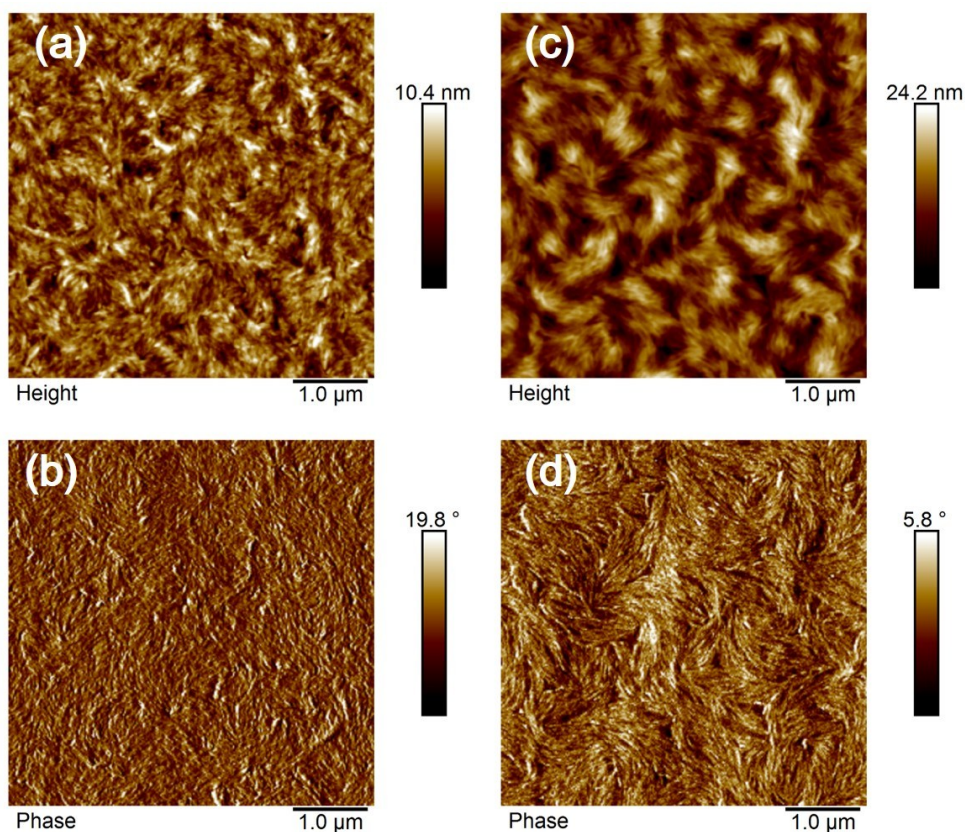

**Fig. S6** AFM tapping mode height and phase image of the surfaces of PBDB-T:ITIC blends obtained under Dark (a, b), 1 Sun (c, d).

**Table S1** Device performance of all samples at standard AM-1.5 illumination.

|                   | Condition | $J_{sc}$ (mA/cm <sup>2</sup> ) | $V_{oc}$<br>(V) | FF<br>(%) | PCE<br>(%) |
|-------------------|-----------|--------------------------------|-----------------|-----------|------------|
| P3HT:PCBM         | Dark      | 9.1± 0.3                       | 0.65± 0.02      | 64.1± 0.2 | 3.8± 0.2   |
|                   | 1 Sun     | 10.0± 0.2                      | 0.67± 0.04      | 66.3± 0.3 | 4.7± 0.3   |
| PTB7-Th :PCBM     | Dark      | 15.7± 0.3                      | 0.81± 0.03      | 68.6± 0.3 | 8.7± 0.2   |
|                   | 1 Sun     | 16.1± 0.2                      | 0.82± 0.04      | 69.5± 0.4 | 9.2± 0.3   |
| PCDTBT:PCBM (1:2) | Dark      | 10.2± 0.4                      | 0.86± 0.02      | 64.1± 0.2 | 5.6± 0.2   |
|                   | 1 Sun     | 10.9± 0.2                      | 0.86± 0.02      | 66.0± 0.4 | 6.2± 0.2   |
| PCDTBT:PCBM (1:4) | Dark      | 11.8± 0.3                      | 0.87± 0.03      | 66.1± 0.2 | 6.8± 0.3   |
|                   | 1 Sun     | 10.4± 0.3                      | 0.86± 0.04      | 63.8± 0.3 | 5.7± 0.3   |
| PBDB-T:ITIC       | Dark      | 16.2± 0.2                      | 0.89± 0.03      | 68.2± 0.2 | 9.8± 0.2   |
|                   | 1 Sun     | 17.2± 0.2                      | 0.89± 0.02      | 69.8± 0.4 | 10.7± 0.2  |

## Device Fabrication

PTB7-Th, P3HT, PCDTBT, PBDB-T, PC<sub>70</sub>BM were all purchased from 1-Material.

All active layers were blade-cast under the same substrate temperature and blade gap, which were performed under the dark and illumination with light intensity of 100 mW cm<sup>-2</sup> (1 sun), using a power-tunable white LED.

The devices of PTB7-Th:PC<sub>70</sub>BM were fabricated with an inverted structure of ITO/ZnO /blends/ MoO<sub>3</sub>/Ag. The ZnO precursor solution was prepared by dissolving 0.5 g of zinc acetate dehydrate (Zn(CH<sub>3</sub>COO)<sub>2</sub>·2H<sub>2</sub>O, 99.9%, Alfa) and 138 ul of ethanolamine (NH<sub>2</sub>CH<sub>2</sub>CH<sub>2</sub>OH, 99.5%, J&K) in 5 ml of 2-methoxyethanol (CH<sub>3</sub>OCH<sub>2</sub>CH<sub>2</sub>OH, 99.8%, Alfa). The ZnO precursor was spin-coated at 4000 rpm for 1 min onto the ITO surface, followed by baking at 200 °C for 10 min in air. Solution of PTB7-Th:PC<sub>70</sub>BM was prepared by dissolving PTB7-Th (4 mg/mL) and PC<sub>70</sub>BM (6 mg/mL) in chlorobenzene with 3 vol% diiodooctane, and stirred overnight prior to blade-coating. The active layers were fabricated by blade coating at a constant speed of 6 mm/s. The substrate temperature was kept at 60 °C and the gap between the knife blade and substrate was 100 μm. The films were then baked at 100 °C for 5 mins in glove box to remove residual solvents. Subsequently, the double-layer structure of MoO<sub>3</sub> (8 nm)/Ag (90 nm) was deposited over the active layer by thermal evaporation under a vacuum chamber to accomplish the device fabrication.

The devices of P3HT:PCBM were fabricated with a structure of ITO/PEDOT:PSS/P3HT:PC<sub>70</sub>BM/Al. For PEDOT:PSS-based devices, a thin layer of PEDOT:PSS was spin-coated with 4000 rpm for 20 seconds onto the cleaned ITO

substrate and then immediately annealed in air at 140 °C for 20 minutes, followed by blade-coating photoactive layer with controlled thickness of  $\approx 100$  nm. The solution for P3HT:PC<sub>70</sub>BM was prepared by a 50:50 weight ratio blend dissolved in chloroform at a concentration of 17 mg/mL, and stirred all night. Finally, Al (90nm) electrode was deposited on the active layer through a shadow mask by thermal evaporation.

For the devices of ITO/PEDOT:PSS/PCDTBT:PCBM/Ca/Al, the PEDOT:PSS layer was fabricated as described before, and the PCDTBT:PCBM has two mixing ratios. PCDTBT and PC<sub>70</sub>BM were dissolved in dichlorobenzene at a ratio of 1:2 by weight with a PCDTBT concentration of 4mg/ml, and then stirred all night prior to blade-cast with a constant speed of 5 mm/s. And then the samples were thermally annealed by being heated to 85 ° C for 1 hour under dry nitrogen. Another solution containing a mixture of PCDTBT:PC<sub>70</sub>BM (1:4) in dichlorobenzene solvent with a concentration of 7 mg/ml was then blade-cast on top of the PEDOT:PSS layer with a constant speed of 10 mm/s. Finally, the double-layer structure of Ca (5 nm)/Al (90 nm) was deposited over the active layer by thermal evaporation after thermally annealed as before.

The devices of PBDB-T:ITIC were fabricated with a structure of ITO/ZnO/ PBDB-T:ITIC /MoO<sub>3</sub>/Ag. The materials of PBDB-T:ITIC(1:1,w/w ) were dissolved in CB (chlorobenzene:DIO 99.5:0.5 volume ratio) with total concentration of 20 mg/mL, and stirred all night. The active layers were fabricated by blade coating at a constant speed of 5 mm/s and then annealed at 150 °C for 10 min blends film in a nitrogen-filled glove box. Other fabrication processes were prepared as described above.
